# Supplementary material
Source: MDPI journal article supplement (https://www.mdpi.com/2218-2004/9/4/79)
Supplement: s1 [file s1]

# Stereomutation in Tetracoordinate Centers via Stabilization of Planar Tetracoordinated Systems Supporting Information

Komal Yadav <sup>1</sup>, Upakarasamy Lourderaj <sup>1,\*</sup> and U. Deva Priyakumar <sup>2,\*</sup>

<sup>1</sup> *School of Chemical Sciences, National Institute of Science Education and Research,  
Bhubaneswar, HBNI, P.O. Jatani, Khordha, 752050, Odisha, India*

<sup>2</sup> *Center for Computational Natural Sciences and Bioinformatics International Institute of  
Information Technology, Hyderabad 500 032, India*

email: *u.lourderaj@niser.ac.in and deva@iiit.ac.in*

# 1 Relative Energies (including ZPE)

Table S1: Relative energies in kcal/mol including the zero-point energies of the neutral and dicationic species of cyclopropene, spiropentene, cyclopropane and spiropentane along with the skeletally substituted derivatives at the MP2/cc-pVTZ level of theory.

|                 | Four valence electrons                                                             |                                                                                    | Two valence electrons                                                               |                                                                                      |
|-----------------|------------------------------------------------------------------------------------|------------------------------------------------------------------------------------|-------------------------------------------------------------------------------------|--------------------------------------------------------------------------------------|
|                 | $\Delta E_{\text{ptX-ttX}}$                                                        |                                                                                    | $\Delta E_{\text{ptX-ttX}}$                                                         |                                                                                      |
| X               | 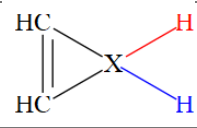  |   |   |   |
| B <sup>-</sup>  | 76.2                                                                               | 42.3                                                                               | -                                                                                   | -26.7                                                                                |
| Al <sup>-</sup> | 27.9                                                                               | 12.6                                                                               | -146.8                                                                              | -7.9                                                                                 |
| Ga <sup>-</sup> | 38.3                                                                               | 17.6                                                                               | -149.4                                                                              | -                                                                                    |
| C               | 112.4                                                                              | 86.9                                                                               | -                                                                                   | -19.1                                                                                |
| Si              | 48.4                                                                               | 22.8                                                                               | -8.7                                                                                | -7.2                                                                                 |
| Ge              | 57.6                                                                               | 27.7                                                                               | -8.5                                                                                | -12.9                                                                                |
| N <sup>+</sup>  | 72.2                                                                               | 92.2                                                                               | -4.5                                                                                | -2.2                                                                                 |
| P <sup>+</sup>  | 74.1                                                                               | 35.4                                                                               | -63.4                                                                               | -4.9                                                                                 |
| As <sup>+</sup> | 79.1                                                                               | 38.8                                                                               | -78.5                                                                               | -6.5                                                                                 |
| X               |  |  |  |  |
| B <sup>-</sup>  | 146.1                                                                              | 98.5                                                                               | -8.3                                                                                | -                                                                                    |
| Al <sup>-</sup> | 41.4                                                                               | 29.2                                                                               | -0.3                                                                                | -13.5                                                                                |
| Ga <sup>-</sup> | 55.9                                                                               | 42.7                                                                               | -1.2                                                                                | -23.4                                                                                |
| C               | 106.5                                                                              | 99.0                                                                               | -                                                                                   | -18.4                                                                                |
| Si              | 75.0                                                                               | 57.1                                                                               | -0.6                                                                                | -9.7                                                                                 |
| Ge              | 82.2                                                                               | 67.2                                                                               | -1.5                                                                                | -15.8                                                                                |
| N <sup>+</sup>  | 66.9                                                                               | 62.8                                                                               | -                                                                                   | -                                                                                    |
| P <sup>+</sup>  | 72.2                                                                               | 99.1                                                                               | -1.0                                                                                | -3.2                                                                                 |
| As <sup>+</sup> | 62.9                                                                               | 105.0                                                                              | -1.3                                                                                | -8.4                                                                                 |

## 2 Bond Index

The bond index for different heteroatom substituted molecules for cyclopropene, cyclopropane, spiropentene, and spiropentane were calculated using the natural bond orbital analysis. The Wiberg bond index for the X-C and C-C bonds for different systems are given below.

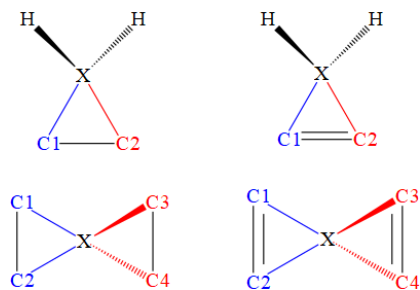

Figure S1: Representative structures for the calculation of bond indexes.

## 2.1 Cyclopropene derivatives

| X               | Four valence electrons |       |      |       | Two valence electrons |       |      |       |
|-----------------|------------------------|-------|------|-------|-----------------------|-------|------|-------|
|                 | ttX                    |       | ptX  |       | ttX                   |       | ptX  |       |
|                 | X-C1                   | C1-C2 | X-C1 | C1-C2 | X-C1                  | C1-C2 | X-C1 | C1-C2 |
| B <sup>-</sup>  | 0.88                   | 1.99  | 0.80 | 1.85  | -                     | -     | 0.61 | 2.30  |
| Al <sup>-</sup> | 0.62                   | 2.04  | 0.54 | 1.97  | 0.48                  | 1.03  | 0.18 | 2.80  |
| Ga <sup>-</sup> | 0.68                   | 2.06  | 0.56 | 1.97  | 0.62                  | 1.03  | 0.20 | 2.77  |
| C               | 0.99                   | 1.97  | 0.44 | 2.45  | -                     | -     | 1.03 | 1.74  |
| Si              | 0.86                   | 1.98  | 0.82 | 1.81  | 0.33                  | 2.60  | 0.48 | 2.51  |
| Ge              | 0.87                   | 2.02  | 0.81 | 1.82  | 0.32                  | 2.61  | 0.45 | 2.52  |
| N <sup>+</sup>  | 0.85                   | 2.00  | 0.54 | 1.23  | 1.09                  | 1.00  | 1.13 | 1.27  |
| P <sup>+</sup>  | 1.02                   | 1.93  | 1.12 | 1.54  | 0.94                  | 1.00  | 0.73 | 2.11  |
| As <sup>+</sup> | 0.98                   | 1.99  | 1.07 | 1.58  | 0.89                  | 1.00  | 0.65 | 2.20  |

Table S2: Wiberg bond index for cyclopropene derivatives calculated for the geometries optimized at MP2/cc-pVTZ level of theory. ‘-’ implies that the structures could not be optimized at the current level of theory.

## 2.2 Cyclopropane derivatives

| X               | Four valence electrons |       |      |       | Two valence electrons |       |      |       |
|-----------------|------------------------|-------|------|-------|-----------------------|-------|------|-------|
|                 | ttX                    |       | ptX  |       | ttX                   |       | ptX  |       |
|                 | X-C1                   | C1-C2 | X-C1 | C1-C2 | X-C1                  | C1-C2 | X-C1 | C1-C2 |
| B <sup>-</sup>  | 0.88                   | 1.00  | 0.86 | 1.12  | 0.37                  | 1.64  | 0.45 | 1.59  |
| Al <sup>-</sup> | 0.63                   | 1.05  | 0.44 | 1.08  | 0.17                  | 1.85  | 0.19 | 1.83  |
| Ga <sup>-</sup> | 0.71                   | 1.05  | 0.46 | 1.10  | 0.18                  | 1.84  | 0.21 | 1.80  |
| C               | 1.00                   | 1.00  | 0.60 | 1.33  | 0.51                  | 1.27  | -    | -     |
| Si              | 0.85                   | 1.04  | 0.63 | 1.06  | 0.37                  | 1.58  | 0.39 | 1.55  |
| Ge              | 0.89                   | 1.05  | 0.26 | 1.76  | 0.37                  | 1.58  | 0.39 | 1.55  |
| N <sup>+</sup>  | 0.87                   | 1.03  | 0.57 | 1.19  | -                     | -     | 0.59 | 1.00  |
| P <sup>+</sup>  | 0.98                   | 1.04  | 0.44 | 1.48  | 0.43                  | 1.15  | 0.45 | 1.16  |
| As <sup>+</sup> | 0.96                   | 1.06  | 0.43 | 1.51  | 0.45                  | 1.20  | 0.47 | 1.20  |

Table S3: Wiberg bond index for cyclopropane derivatives calculated for the geometries optimized at MP2/cc-pVTZ level of theory. ‘-’ implies that we were not able to locate the structures at the current level of theory.

## 2.3 Spiropentene derivatives

| Four valence electrons |      |      |       |       |      |      |       |       |
|------------------------|------|------|-------|-------|------|------|-------|-------|
| X                      | ttX  |      |       |       | ptX  |      |       |       |
|                        | X-C1 | X-C3 | C1-C2 | C3-C4 | X-C1 | X-C3 | C1-C2 | C3-C4 |
| B <sup>-</sup>         | 0.86 | 0.86 | 1.93  | 1.93  | 0.81 | 0.81 | 1.87  | 1.87  |
| Al <sup>-</sup>        | 0.60 | 0.60 | 2.00  | 2.00  | 0.57 | 0.57 | 1.98  | 1.98  |
| Ga <sup>-</sup>        | 0.65 | 0.65 | 2.03  | 2.03  | 0.59 | 0.59 | 2.00  | 2.00  |
| C                      | 0.98 | 0.98 | 1.89  | 1.89  | 0.98 | 0.98 | 1.69  | 1.69  |
| Si                     | 0.83 | 0.83 | 1.92  | 1.92  | 0.80 | 0.80 | 1.86  | 1.86  |
| Ge                     | 0.84 | 0.84 | 1.97  | 1.97  | 0.79 | 0.79 | 1.90  | 1.90  |
| N <sup>+</sup>         | 0.87 | 0.87 | 1.92  | 1.92  | 0.69 | 0.69 | 2.07  | 2.07  |
| P <sup>+</sup>         | 0.99 | 0.99 | 1.84  | 1.84  | 0.99 | 0.99 | 1.71  | 1.71  |
| As <sup>+</sup>        | 0.97 | 0.97 | 1.91  | 1.91  | 0.95 | 0.95 | 1.77  | 1.77  |

Table S4: Wiberg bond index for spiropentene derivatives (X having four valence electrons) for the geometries optimized at MP2/cc-pVTZ level of theory.

| Two valence electrons |      |      |       |       |      |      |       |       |
|-----------------------|------|------|-------|-------|------|------|-------|-------|
| X                     | ttX  |      |       |       | ptX  |      |       |       |
|                       | X-C1 | X-C3 | C1-C2 | C3-C4 | X-C1 | X-C3 | C1-C2 | C3-C4 |
| B <sup>-</sup>        | 0.41 | 1.29 | 1.50  | 2.51  | 0.84 | 0.84 | 2.00  | 2.00  |
| Al <sup>-</sup>       | 0.60 | 0.86 | 0.22  | 1.86  | 0.60 | 0.60 | 2.25  | 2.25  |
| Ga <sup>-</sup>       | -    | -    | -     | -     | 0.65 | 0.65 | 2.21  | 2.21  |
| C                     | 0.52 | 1.46 | 2.23  | 1.23  | 0.96 | 0.96 | 1.77  | 1.77  |
| Si                    | 0.40 | 1.19 | 2.52  | 1.63  | 0.80 | 0.80 | 2.08  | 2.08  |
| Ge                    | 0.40 | 1.19 | 2.50  | 1.67  | 0.80 | 0.80 | 2.08  | 2.08  |
| N <sup>+</sup>        | 0.37 | 1.36 | 2.05  | 1.09  | 0.87 | 0.87 | 1.57  | 1.57  |
| P <sup>+</sup>        | 0.51 | 1.43 | 2.22  | 1.33  | 0.93 | 0.93 | 1.88  | 1.88  |
| As <sup>+</sup>       | 0.48 | 1.38 | 2.23  | 1.44  | 0.88 | 0.88 | 1.93  | 1.93  |

Table S5: Wiberg bond index for spiropentene derivatives (X having two valence electrons) for the geometries optimized at MP2/cc-pVTZ level of theory. ‘-’ implies that we were not able to locate the structures at the current level of theory.

## 2.4 Spiropentane derivatives

| Four valence electrons |      |      |       |       |      |      |       |       |
|------------------------|------|------|-------|-------|------|------|-------|-------|
| X                      | ttX  |      |       |       | ptX  |      |       |       |
|                        | X-C1 | X-C3 | C1-C2 | C3-C4 | X-C1 | X-C3 | C1-C2 | C3-C4 |
| B <sup>-</sup>         | 0.89 | 0.89 | 0.98  | 0.98  | 0.66 | 0.66 | 1.05  | 1.05  |
| Al <sup>-</sup>        | 0.60 | 0.60 | 1.04  | 1.04  | 0.50 | 0.50 | 1.06  | 1.06  |
| Ga <sup>-</sup>        | 0.69 | 0.69 | 1.04  | 1.04  | 0.50 | 0.50 | 1.05  | 1.05  |
| C                      | 0.99 | 0.99 | 0.98  | 0.98  | 0.78 | 0.78 | 1.12  | 1.12  |
| Si                     | 0.84 | 0.84 | 1.01  | 1.01  | 0.65 | 0.65 | 1.04  | 1.04  |
| Ge                     | 0.88 | 0.88 | 1.02  | 1.02  | 0.66 | 0.66 | 1.06  | 1.06  |
| N <sup>+</sup>         | 0.88 | 0.88 | 1.00  | 1.00  | 0.71 | 0.71 | 1.06  | 1.06  |
| P <sup>+</sup>         | 0.99 | 0.99 | 0.99  | 0.99  | 0.80 | 0.80 | 1.03  | 1.03  |
| As <sup>+</sup>        | 0.98 | 0.98 | 1.01  | 1.01  | 0.76 | 0.76 | 1.05  | 1.05  |

Table S6: Wiberg bond index for spiropentane derivatives (X having four valence electrons) for the geometries optimized at MP2/cc-pVTZ level of theory.

| Two valence electrons |      |      |       |       |      |      |       |       |
|-----------------------|------|------|-------|-------|------|------|-------|-------|
| X                     | ttX  |      |       |       | ptX  |      |       |       |
|                       | X-C1 | X-C3 | C1-C2 | C3-C4 | X-C1 | X-C3 | C1-C2 | C3-C4 |
| B <sup>-</sup>        | -    | -    | -     | -     | 0.71 | 0.71 | 1.20  | 1.20  |
| Al <sup>-</sup>       | 0.21 | 0.78 | 1.80  | 1.01  | 0.56 | 0.56 | 1.30  | 1.30  |
| Ga <sup>-</sup>       | 0.24 | 0.85 | 1.76  | 1.11  | 0.60 | 0.60 | 1.26  | 1.26  |
| C                     | 0.47 | 1.17 | 1.29  | 0.91  | 0.81 | 0.81 | 1.12  | 1.12  |
| Si                    | 0.36 | 0.97 | 1.55  | 0.96  | 0.70 | 0.70 | 1.21  | 1.21  |
| Ge                    | 0.37 | 0.97 | 1.52  | 0.98  | 0.71 | 0.71 | 1.19  | 1.19  |
| N <sup>+</sup>        | -    | -    | -     | -     | 0.69 | 0.69 | 1.04  | 1.04  |
| P <sup>+</sup>        | 0.39 | 1.06 | 1.21  | 0.92  | 0.71 | 0.71 | 1.12  | 1.12  |
| As <sup>+</sup>       | 0.40 | 0.97 | 1.21  | 0.97  | 0.68 | 0.68 | 1.12  | 1.12  |

Table S7: Wiberg bond index for spiropentane derivatives (X having two valence electrons) for the geometries optimized at MP2/cc-pVTZ level of theory. ‘-’ implies that we were not able to locate the structures at the current level of theory.

### 3 References

1. Wiberg, K. B. Application of the pople-santry-segal CNDO method to the cyclopropylcarbinyl and cyclobutyl cation and to bicyclobutane. *Tetrahedron*, **1968**, *24*, 1083-1096.
